# Supplementary material
Source: Springer Nature journal article supplement (https://www.springermedizin.de/resource/supplementary/12943_2009_520_MOESM9_ESM.pdf/9554980)

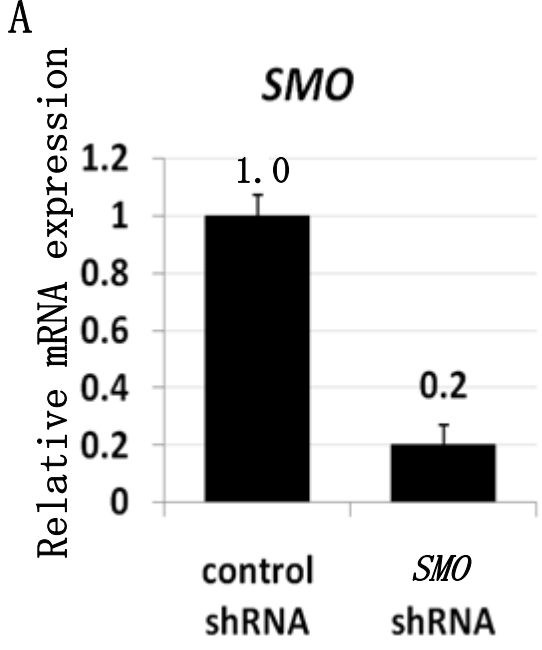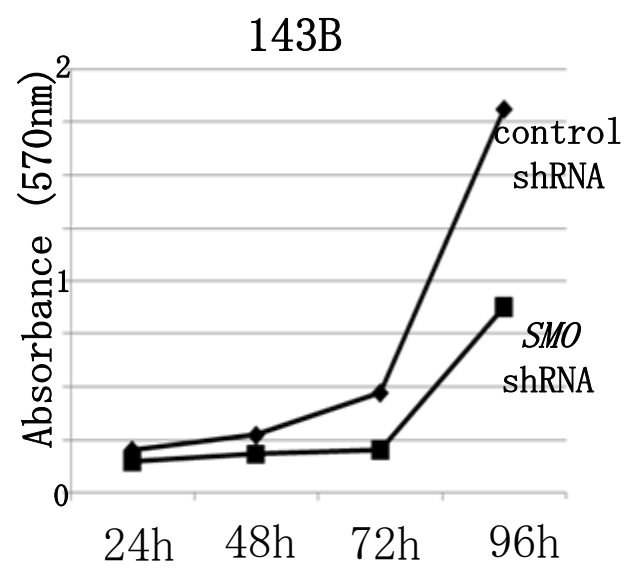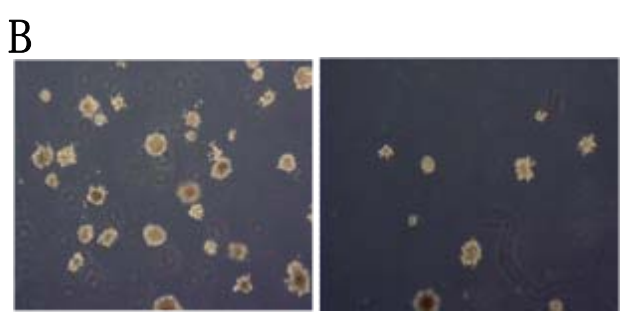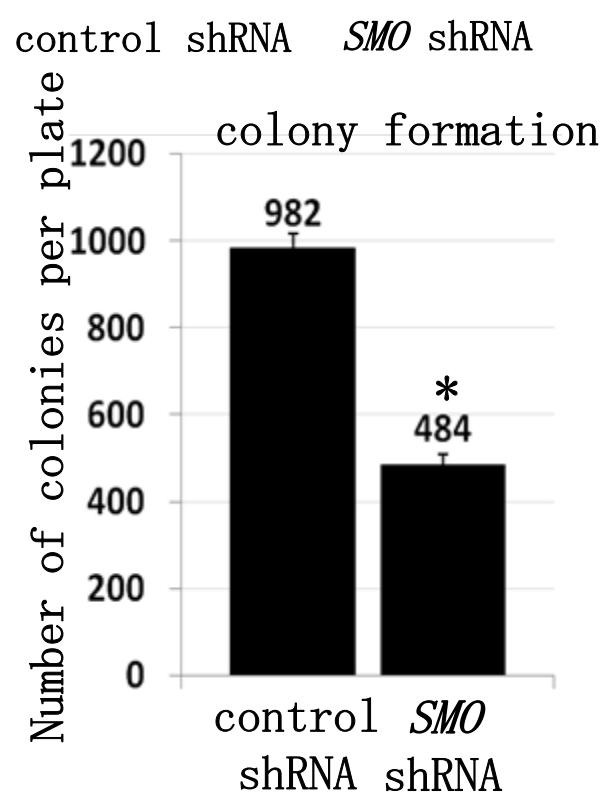

(\*:  $P < 0.01$ )

Supplement: MOESM9 [file 9554980]
